# Supplementary material for: Comprehensive genetic and epigenetic analysis of sporadic meningioma for macro-mutations on 22q and micro-mutations within the NF2 locus
Source: PubMed Central journal article supplement (PMC1781436; doi:10.1186/1471-2164-8-16), 2007-01-12
Supplement: 1471-2164-8-16-S1.pdf [file 1471-2164-8-16-S1.pdf]

**Additional file 1.** List of non- 22q-derived genomic clones that encompass genes of potential interest in tumor formation/progression.

| <b>Clone name</b> | <b>Gene</b>   |
|-------------------|---------------|
| RP11-286N3        | <i>DAL-1</i>  |
| RP11-78G22        | <i>DAL-1</i>  |
| RP11-34D4         | <i>PTCH1B</i> |
| RP11-102H4        | <i>PTCH2A</i> |
| RP11-47A8         | <i>SUFU1A</i> |
| RP11-170J3        | <i>SUFU1B</i> |
