# Supplementary material for: Comprehensive genetic and epigenetic analysis of sporadic meningioma for macro-mutations on 22q and micro-mutations within the NF2 locus
Source: PubMed Central journal article supplement (PMC1781436; doi:10.1186/1471-2164-8-16), 2007-01-12
Supplement: 1471-2164-8-16-S2.pdf [file 1471-2164-8-16-S2.pdf]

**Additional file 2.** Table summarizing primer pairs used for amplification of bisulfite treated DNA, sequencing primers, analyzed sequences and dispensation order.

|                     |                  |                                                                              |
|---------------------|------------------|------------------------------------------------------------------------------|
| PCR primer pair     | NF2_F1<br>NF2_R1 | TGGTGGAGTTATTTAAAGGAGG<br>CACAAACCTCAAAACCACCATAAT                           |
| PCR product size    | 550 bp           |                                                                              |
| Sequencing primer   | NF2_S1c          | ATTGGTGGAGTTATTTAAAGGAG                                                      |
| Sequence to analyze |                  | GYGGGAYGGAGYGGGAAAGTTTTGTTATTTGGTTTTTTAGTTAATYGTAGTATTTATGYGTTAGTTTTYGGTTYGG |
| No of CpGs          | 7                |                                                                              |
| No of bases         | 79               |                                                                              |
| Dispensation order  | 60               | AGTCGTATCGATGTCGAGTTGTATTGTTAGTGATCGTAGTATATAGTCGTATGTTTCAGTC                |
| Sequencing primer   | NF2_S2           | GGAGTGAGGAGGGTGATA                                                           |
| Sequence to analyze | 9                | GTTAYGYGYGYGTAYGYGTTYGATGTAGYG                                               |
| No of CpGs          | 9                |                                                                              |
| No of bases         | 32               |                                                                              |
| Dispensation order  | 47               | TGTGATCTGTCAGTCTGTCAGTCGTGATCTGTCAGTCGATGTATGTC                              |
| Sequencing primer   | NF2_S3           | GGGTTGTGGGGAGGG                                                              |
| Sequence to analyze |                  | TGYGTTTTTYGYGGGYGYGYGGAGTGAGGAYG                                             |
| No of CpGs          | 7                |                                                                              |
| No of bases         | 32               |                                                                              |
| Dispensation order  | 46               | GTAGTCTGTTCAGTCTGTCAGTCTGTCGAGTGAGTATCGTGATAGT                               |
| Sequencing primer   | NF2_S5           | AGTGAGGAAGGTGATAGTTA                                                         |
| Sequence to analyze |                  | YGYGYGYGYGTAYGYGTTYGATGTAGYGYGGTTTTY                                         |
| No of CpGs          | 11               |                                                                              |
| No of bases         | 36               |                                                                              |
| Dispensation order  | 52               | ATCTGTCAGTCTGTCAGTCGTGATCTGTCAGTCGATGTATGTCAGTCTGTTC                         |
| PCR primer pair     | NF2_F7<br>NF2_R7 | GGTGGTTTTGAGGTTTGTGTAGTA<br>AAAACATCCAACCTTCTCCAATAA                         |
| PCR product size    | 339 bp           |                                                                              |
| Sequencing primer   | NF2_S8           | GGAGTTTAATTGAGAGGTAA                                                         |
| Sequence to analyze |                  | TYGGTYGGTAGTTTTYGATTGTTGYGGTGATAGTYGAGGTGGAAGTTYG                            |
| No of CpGs          | 6                |                                                                              |
| No of bases         | 48               |                                                                              |
| Dispensation order  | 46               | ATCTGTCGATGTTTCGATGTAGTCGTGATATGTCGAGTGATGTCGA                               |
