# Supplementary material for: Comprehensive genetic and epigenetic analysis of sporadic meningioma for macro-mutations on 22q and micro-mutations within the NF2 locus
Source: PubMed Central journal article supplement (PMC1781436; doi:10.1186/1471-2164-8-16), 2007-01-12
Supplement: 1471-2164-8-16-S3.pdf [file 1471-2164-8-16-S3.pdf]

**Additional file 3.** Table summarizing DNA copy number changes in the additional subset of 26 sporadic meningiomas not studied for *NF2* gene point mutations or *NF2* promoter methylation status.

| Sample ID | Subtype <sup>1</sup> | DNA copy number profiles <sup>2</sup> |                                                                |
|-----------|----------------------|---------------------------------------|----------------------------------------------------------------|
|           |                      | Chromosome 22                         | Chromosome 1                                                   |
| M157      | A                    | NAD                                   | TD 1p (1-1185)                                                 |
| M100      | Ang                  | Monosomy                              | TD 1p (1-1100)                                                 |
| M84       | F                    | NAD                                   | TD 1p (1-33)                                                   |
| M136      | F                    | NAD                                   | TD 1p (1-840)                                                  |
| M145      | F                    | Terminal deletion                     | TD 1p (1-898)                                                  |
| M149      | F                    | NAD                                   | TD 1p (1-762)                                                  |
| M155      | F                    | TD from clone 167                     | TD 1p and ID                                                   |
| M166      | F                    | NAD                                   | TD 1p and ID                                                   |
| M172      | F                    | Monosomy                              | NS                                                             |
| M134      | M                    | Monosomy                              | TD 1p, 2 levels of fluorescent ratio loss (1-1159) (1160-1379) |
| M150      | M                    | NAD                                   | TD 1p (1-1159)                                                 |
| M151      | M                    | Monosomy                              | NAD                                                            |
| M161      | M                    | Monosomy                              | TD 1p and ID                                                   |
| M169      | M                    | Monosomy                              | NS                                                             |
| M173      | M                    | NAD                                   | NS                                                             |
| M174      | M                    | NAD                                   | NS                                                             |
| M106      | P                    | Terminal del                          | 1p ID                                                          |
| M165      | P                    | NAD                                   | NS                                                             |
| M36       | T                    | Monosomy                              | NS                                                             |
| M47       | T                    | Monosomy                              | NS                                                             |
| M121      | T                    | Monosomy                              | TD 1p (1-681)                                                  |
| M137      | T                    | NAD                                   | NAD                                                            |
| M156      | T                    | TD from clone 91                      | TD 1p and ID                                                   |
| M159      | T                    | NAD                                   | TD 1p and A                                                    |
| M162      | T                    | Monosomy                              | TD 1p (1-1010)                                                 |
| M168      | U                    | NAD                                   | TD 1p (1-1041)                                                 |

**1** Tumors are grouped according to histopathological subtypes. Abbreviations: Anaplastic, A; Angiomatous, Ang; Fibroblastic, F; Meningothelial, M; Psammomatous, P; Transitional, T; and Unclassified, U.

**2** Data from copy number imbalances on chromosome 1 were previously published and naming of tumor samples is identical [34]. Abbreviations: Terminal Deletion, TD; Interstitial Deletion, ID; Amplification/gain, A; and Not Studied, NS.
