# Supplementary material for: Comprehensive genetic and epigenetic analysis of sporadic meningioma for macro-mutations on 22q and micro-mutations within the NF2 locus
Source: PubMed Central journal article supplement (PMC1781436; doi:10.1186/1471-2164-8-16), 2007-01-12
Supplement: 1471-2164-8-16-S4.pdf [file 1471-2164-8-16-S4.pdf]

**Additional file 4.** Table summarizing primers used for PCR amplification and sequencing of the *NF2* gene

| PCR-primer no. | Primer name       | Sequence               | Tm   | PCR product (bp) |
|----------------|-------------------|------------------------|------|------------------|
| 1              | jd.Inter1.p1.U    | GGCTGGCTAGCACAATTAG    | 60.7 | 695              |
| 2              | jd.Inter1.p1.L    | GTTTTTATGTGGCACTCTGTC  | 59.5 |                  |
| 3              | jd.Inter2.p1.U    | CCAGCCTTTCTGGACTAT     | 56.4 | 1336             |
| 4              | jd.Inter2.p1.L    | GCTTGAATGATGTTGTTGTAT  | 57.3 |                  |
| 5              | jd.Inter3_4.p1.U  | GTCCTCCCAGGAACATTA     | 56.4 | 825              |
| 6              | jd.Inter3_4.p1.L  | TCAGGAAATGTGAATTACAG   | 55.1 |                  |
| 13             | jd.int1.p2inner.U | CATAGTCCCTGGCAGAAA     | 57.9 | 1044             |
| 14             | jd.int1.p2inner.L | CTTACTTCTGAAACAGGAATAG | 56.1 |                  |
| 67             | jd.ex1.p3.U       | AACCCAAATTCAGCAATT     | 57.1 | 2103             |
| 68             | jd.ex1.p3.L       | CCACCTTGCCATTTACTA     | 55.8 |                  |
| 69             | jd.ex1.p4.U       | ATGGGCATCATAGAGTAT     | 50.6 | 2186             |
| 70             | jd.ex1.p4.L       | GGCTGTGAGCTTGGTTC      | 57.5 |                  |
| 171            | jd.ex1.p5.U       | CCCTACACCCGTTAGAA      | 54.9 | 2247             |
| 173            | jd.ex1.p5.L       | TTGAGAAGCAGTACTGTACG   | 55.6 |                  |
| 172            | jd.ex1.p6.U       | CCGTTAGAACCCTTGATGAC   | 61.7 | 2199             |
| 15             | jd.ex2.p1.U       | CCATGTCTGTGCGAAAGAT    | 54.1 | 1385             |
| 16             | jd.ex2.p1.L       | ATCAGGCTGGTAAACAATG    | 54.8 |                  |
| 153            | jd.ex3.p2.U       | AAAGGCAGTGGTTTACAGAC   | 59.0 | 2046             |
| 154            | jd.ex3.p2.L       | GGGACAAACCAAGTGTCAC    | 59.4 |                  |
| 19             | jd.ex4up1.p1.U    | TGTTCTTGCAGTTTTTCTATAG | 57.6 | 896              |
| 20             | jd.ex4up1.p1.L    | ACAGGTGGAGAGTTTCAGTC   | 55.0 |                  |
| 21             | jd.Ex4.p1.U       | GGGCTGAGGCTGTAGTCAT    | 61.7 | 1123             |
| 22             | jd.Ex4.p1.L       | ACCCTCTCATCGGTCTTGT    | 60.6 |                  |
| 23             | jd.lnt4.p1.U      | ATTGGCTCCACAAGTCTTTTA  | 61.8 | 686              |
| 24             | jd.lnt4.p1.L      | GCCATCCTCTGCATTACTT    | 59.5 |                  |
| 25             | jd.Ex5.p1.U       | AGGCTCTTTGAGAATGAGAG   | 58.1 | 1216             |
| 26             | jd.Ex5.p1.L       | TGGTGACCCCAAATAACT     | 59.4 |                  |
| 27             | jd.Ex6.p1.U       | GGGCATTGTGGTTTTTAAT    | 59.9 | 810              |
| 28             | jd.Ex6.p1.L       | ACAGGCAGTACACATACCTACT | 58.3 |                  |
| 147            | jd.Ex.7.p3.L      | AATGCTTTGGCAAATCG      | 59.3 | 810              |
| 148            | jd.Ex.7.p3.U      | TCTGGCAGCGACGTG        | 57.8 |                  |
| 31             | jd.Ex8.p1.U       | TATGGGCTTTAATTCTATACC  | 56.8 | 943              |
| 32             | jd.Ex8.p1.L       | GCTCAATAAAGACCACACTTA  | 57.2 |                  |
| 33             | jd.Ex9.p1.U       | CCAGGACAAGGCATAACTT    | 59.5 | 788              |
| 34             | jd.Ex9.p1.L       | GTGGGTACACAGCTATTTCACT | 58.9 |                  |
| 35             | jd.Ex10.p1.U      | GCTTTGGTGTTCCTACTCTATG | 59.8 | 1179             |
| 36             | jd.Ex10.p1.L      | GCCACGAGCTCTTCATG      | 58.6 |                  |
| 37             | jd.lnt10.p1.U     | CAGGAACTGAAGGAGATTAC   | 55.7 | 1641             |
| 38             | jd.lnt10.p1.L     | GCCACTTGAAAAACAGTCTA   | 57.5 |                  |
| 39             | jd.Ex11.p1.U      | GGGTCCATGTGGATTAG      | 59.4 | 998              |
| 40             | jd.Ex11.p1.L      | CAAACGCTGCTAACTCAT     | 55.9 |                  |
| 41             | jd.Ex12.p1.U      | GAGAAGGTGCTCTTGTTACTC  | 58.0 | 1085             |
| 42             | jd.Ex12.p1.L      | TAAAAGCCAAATTCAGTG     | 56.1 |                  |
| 43             | jd.Ex13.p1.U      | TCACATGCCGTGACCA       | 57,6 | 645              |
| 44             | jd.Ex13.p1.L      | GGCTCACCGGGTACG        | 58,6 |                  |
| 45             | jd.Ex13d1.p1.U    | AAGCCACGTACCCG         | 58,6 | 1021             |
| 46             | jd.Ex13d1.p1.L    | CGGAGAACCGGGATATA      | 57,8 |                  |
| 47             | jd.Ex14.p1.U      | CCCAAGCTCCTAATCCG      | 60,4 | 776              |
| 48             | jd.Ex14.p1.L      | GGGCCCTCGCTTAGAT       | 59,5 |                  |
| 49             | jd.Ex15.p1.U      | TCAAACCTAGATCGCA       | 56.0 | 1096             |

|     |              |                       |      |      |
|-----|--------------|-----------------------|------|------|
| 50  | jd.Ex15.p1.L | CCCTGGAGTTTTTCAGATAC  | 56.0 |      |
| 51  | jd.Ex16.p1.U | GGAGGCCTCGGTCATTA     | 60,2 | 1919 |
| 52  | jd.Ex16.p1.L | GGAGCAGTGCAAATTTAACTA | 60,3 |      |
| 179 | jd.ex17.p2.U | CAGGGCATGAGGACTAA     | 55.1 | 993  |
| 180 | jd.ex17.p2.L | GGGCTCCCTGACGATGA     | 63.2 |      |
| 181 | jd.ex17.p3.U | CTCAGGGACCTTGGTAGAT   | 57.9 | 929  |
| 182 | jd.ex17.p3.L | ACCCAGCACTTGCTCGTC    | 61.7 |      |

| Sequencing primer no. | Primer name    | Sequence                | Tm   |
|-----------------------|----------------|-------------------------|------|
| 73                    | jd.inter1.s1.U | TTAGGGTTGGA CT CAGTTCT  | 58.3 |
| 74                    | jd.inter1.s2.U | GGCAGGTT CATAAGTG TAAA  | 57.6 |
| 75                    | jd.inter2.s1.U | CCACTCCGCGTATAGATTA     | 58.4 |
| 169                   | jd.inter2.s1.L | TAGCCTTTTAAAGTGGTTTATAA | 59.6 |
| 169                   | jd.inter2.s1.L | TAGCCTTTTAAAGTGGTTTATAA | 59,6 |
| 175                   | jd.inter2.s2.L | CCCAAGCACGTCAACAA       | 59,9 |
| 176                   | jd.inter2.s3.L | GGGCATTTGCTTCCTTG       | 61,1 |
| 170                   | jd.inter3.s2.L | TGCGTGACACTGGGAAC       | 59.1 |
| 76                    | jd.inter3.s1.U | CATTAAATTTGGCATTGG      | 59.1 |
| 77                    | jd.inter4.s1.L | GCAGACATTGTTGCTGTAAC    | 58.2 |
| 78                    | jd.int1.s2.U   | AGGTGGCTTTTCAAGAAG      | 56.8 |
| 79                    | jd.int1.s3.U   | GCCTCCTTCTCCTGTTGT      | 58.4 |
| 80                    | jd.int1.s3.L   | AAAGCCACCTACATTTGAC     | 56.8 |
| 192                   | jd.ex1.s1.U    | AGTGCCAGCAAACCTAACA     | 60.9 |
| 193                   | jd.ex1.s2.U    | GAGTGAGGACGGTGACAG      | 56.7 |
| 194                   | jd.ex1.s3.U    | GCCCCGTGACCCTAGTC       | 62.1 |
| 195                   | jd.ex1.s4.U    | GGCCTGTGCAGCAACTC       | 61.4 |
| 196                   | jd.ex1.s5.U    | TTCCCGCATGAGCTTCA       | 62.7 |
| 197                   | jd.ex1.s1.L    | GAAAAGGGAAACAAGTATTG    | 56.7 |
| 198                   | jd.ex1.s2.L    | AAGACGCAACTTCTAATACC    | 56.4 |
| 199                   | jd.ex1.s3.L    | TAAGCGTAAGCCTAACTTAA    | 56.1 |
| 200                   | jd.ex1.s4.L    | TTAAGCCTGACACTGAAATC    | 57.3 |
| 201                   | jd.ex1.s5.L    | TGCCAAAACCCAAAAGTC      | 60.9 |
| 202                   | jd.ex1.s6.L    | AAAGCAGCAATCATCTTTA     | 55.5 |
| 203                   | jd.ex1.s7.L    | CAAAACCCAAAAGTCCTATGA   | 62.1 |
| 204                   | jd.ex1.s8.L    | TGTCACCGTCCTCACTC       | 54.2 |
| 205                   | jd.ex1.s9.L    | GTCGCCAGACCACTAC        | 57.1 |
| 206                   | jd.ex1.s10.L   | GGAGGCTGACGCATAGAT      | 59.7 |
| 207                   | jd.ex1.s6.U    | ACGCCGAGATGGAGTTC       | 59.9 |
| 208                   | jd.ex1.s7.U    | CCCCAACTCCCCTTTC        | 59.1 |
| 209                   | jd.ex1.s8.U    | TCCCCTTTCGCTCAG         | 60.1 |
| 210                   | jd.ex1.s9.U    | AAAGGGCTCAGAGTGC        | 53.8 |
| 215                   | jd.ex1.s10.U   | ACTGCCAAAGAAGAATATTC    | 56.1 |
| 216                   | jd.ex1.s11.U   | ACACTCGGAGCCTACTTGA     | 59.6 |
| 217                   | jd.ex1.s12.U   | ATAGGGGTCCGGTATATGTGA   | 59.1 |
| 218                   | jd.ex1.s13.U   | GCCTCCACAAGTGTCTTTA     | 57.4 |
| 219                   | jd.ex1.s14.U   | GCCTCAACCAGTCTTGTTA     | 57.4 |
| 220                   | jd.ex1.s11.L   | GGTTGCTTCCTCTTGAGAG     | 58.8 |
| 221                   | jd.ex1.s12.L   | CTTCCACCTCGACTGTCAC     | 59.5 |
| 222                   | jd.ex1.s13.L   | ACGGCCTGCACTCTGAG       | 60.9 |
| 223                   | jd.ex1.s14.L   | TGCACTCTGAGCCCTTAG      | 60.6 |
| 224                   | jd.ex1.s15.L   | GAGGACCCTGCCTGAGC       | 62.1 |
| 82                    | jd.ex2.s2.U    | TTTCAAGGGAATGAATGTC     | 57.2 |
| 83                    | jd.ex2.s3.U    | CCCCATTGGTTTGTATT       | 57.4 |
| 177                   | jd.ex2.s4.L    | TCTCCAAAGCTGCTAATTTAG   | 60   |
| 213                   | jd.ex2.s4.U    | CCCCGAGTTAACTTAAGAG     | 56.6 |

|     |                |                         |      |
|-----|----------------|-------------------------|------|
| 214 | jd.ex2.s5.U    | ACCAGCTTTCCTAAATTAGC    | 58.7 |
| 84  | jd.ex3.s1.U    | ATAGGTGACTTTGTGAATACTTC | 57.7 |
| 85  | jd.ex3.s2.U    | TACCCCCAGTTCTGAGA       | 59.6 |
| 185 | jd.ex3.s3.U    | TCTTGGGGCTATTGATTAA     | 58   |
| 186 | jd.ex3.s2.L    | AGAGCAAAAAGACAAACACAC   | 56,9 |
| 190 | jd.ex4.s5.L    | AACAGTGACAGTGGTTCTT     |      |
| 191 | jd.ex4.s6.L    | CACAAGTCCCATAACATCTCA   |      |
| 87  | jd.ex4up1.s1.U | ACTGCCTGTCTCTTGTGTGA    | 60.0 |
| 88  | jd.ex4up1.s2.U | GCTTCCTTTTCCCTTAGAG     | 58.3 |
| 89  | jd.ex4up1.s1.L | CTCCTCTCACAGATGTCAACA   | 59.6 |
| 92  | jd.ex4.s3.U    | TTCCTGTGTAATCTCATTATGT  | 56.6 |
| 178 | jd.ex4.s4.U    | GTTGCTCCTTTCAGGTAA      | 54,6 |
| 93  | jd.int4.s1.L   | GAAAGGGTAGGATGCTAAA     | 56.8 |
| 95  | jd.ex5.s2.U    | ATGGCAGTGTGACATCAG      | 58.0 |
| 96  | jd.ex5.s3.U    | TCACCCATCCATCTCTTAC     | 56.4 |
| 155 | jd.ex5.s4.U    | CTGTTGGTGGCTAAAAGA      | 55.6 |
| 158 | jd.ex5.s1.L    | AATTGGAGCCCATTACTAG     | 56,7 |
| 97  | jd.ex6.s1.U    | CCCTCTCTCTGTGTGACTAT    | 55.1 |
| 98  | jd.ex6.s1.U    | GGTATTGTTTGCCACTTTT     | 57.3 |
| 159 | jd.ex7.s1.L    | CAGAGCCAGAAATAATCA      | 52.5 |
| 160 | jd.ex7.s2.U    | TCCACCCATCTCACTTAG      | 54.2 |
| 161 | jd.ex7.s3.U    | CAAGGCGATAGACTCTTT      | 54.1 |
| 162 | jd.ex7.s4.U    | GCTCCTTGTGTAGTAGACAG    | 53.8 |
| 163 | jd.ex7.s5.L    | CTTCCTTTTCTTCTTTAC      | 55.2 |
| 99  | jd.Ex8.s1.L    | TGGGGGTCAGTCTGTTCT      | 59.0 |
| 100 | jd.Ex8.s1.U    | TGGGACCTGCTGAAACT       | 57.3 |
| 101 | jd.Ex8.s2.U    | TGACAAGGAGGTAGGACAT     | 56.1 |
| 102 | jd.Ex9.s1.U    | GACAAGGCATAACTTCATG     | 55.0 |
| 103 | jd.Ex9.s1.L    | TCATGATATAATTTAGTTTT    | 47.0 |
| 104 | jd.Ex10.s1.U   | GCATTCATCTTCACGTTTAC    | 57.6 |
| 105 | jd.Ex10.s2.U   | GCCGTGGACATACCTGCT      | 63.1 |
| 106 | jd.Ex10.s3.U   | GCTGGAATGCTAATTTGACT    | 59.5 |
| 107 | jd.int10.s1.U  | CAAGCAATAAAACAGTGAAAG   | 58.2 |
| 108 | jd.int10.s2.U  | AGCCACCTTATGGAAATTGT    | 61.2 |
| 109 | jd.int10.s3.U  | AAGCAGCAGTCTTAGAAACC    | 58.8 |
| 110 | jd.int10.s4.U  | GCTCCCCCTGTGAAAT        | 61.7 |
| 111 | jd.ex11.s1.L   | GCCATTGTTGCTTCTTCTT     | 59.8 |
| 114 | jd.ex12.s2.U   | CTGCTTGCCCATCTTCT       | 57.5 |
| 168 | jd.ex12.s2.L   | CCTCAGCCATCTTCAGTG      | 57,7 |
| 183 | jd.ex12.s3.U   | GGAGGAGGCAAAACTTCT      | 58,3 |
| 184 | jd.ex12.s3.L   | AAGCGGTCTGTGGATATG      | 57,7 |
| 115 | jd.ex13.s1.U   | TTCCTGCTCTTCCAGTTT      | 56.8 |
| 116 | jd.ex13d1.s1.L | GCACGGCAGTAATTCACTC     | 60.6 |
| 117 | jd.ex13d1.s1.U | CTGAGCTGAATGTAATCTTC    | 54.1 |
| 118 | jd.ex14.s1.L   | ACAACCCAGTCCTACACTTT    | 58.0 |
| 119 | jd.ex14.s1.U   | AGGTTTGCTCTGCTCTTAC     | 56.4 |
| 164 | jd.ex14.s2.L   | GCCCCAATCACTCAGTCTAGT   | 63   |
| 174 | jd.ex14.s3.L   | TGAATGCTGATCTGTTGTC     | 55,2 |
| 120 | jd.ex15.s1.L   | TCCCTTTCTGGCATAAGTT     | 59.4 |
| 121 | jd.ex15.s1.U   | TGGCAGCAGCAAGCACA       | 64.7 |
| 123 | jd.ex15.s2.U   | TTTCCCTCTAGTCTTGTGG     | 56.6 |
| 211 | jd.ex15.s3.U   | AGCCGTGTCTCACTGTCT      | 56.3 |
| 212 | jd.ex15.s2.L   | ACAGGGGTTTCATTACATCA    | 57.1 |
| 124 | jd.ex16.s1.L   | CCTGGGAACAACCTACTTT     | 58.6 |
| 125 | jd.ex16.s1.U   | TGGCACTTATGGCATTGT      | 59.2 |
| 126 | jd.ex16.s2.U   | AGGACCAGCCATTCTTC       | 56.0 |

|     |              |                     |      |
|-----|--------------|---------------------|------|
| 127 | jd.ex16.s3.U | GCAAACCCAGAGCACAG   | 58.5 |
| 128 | jd.ex16.s4.U | CAGCAGCATAGGATGTGTC | 58.2 |
| 129 | jd.ex16.s5.U | ATCCTTGTTGGCATTGATA | 57.9 |
| 188 | jd.ex17.s2.U | TCCCAGCCACCTTTGAG   | 60.9 |
| 189 | jd.ex17.s1.L | AGGTCAGCTCTGGAGTGC  | 59.1 |
